# Supplementary material for: Peripheral Sensory Nerve Tissue but Not Connective Tissue Is Involved in the Action of Acupuncture
Source: PubMed Central journal article supplement (PMC6401607; doi:10.3389/fnins.2019.00110), 2019-02-20
Supplement: Image_1.pdf [file Image_1.pdf]

## Supplementary Material

### 1. Supplementary Figures

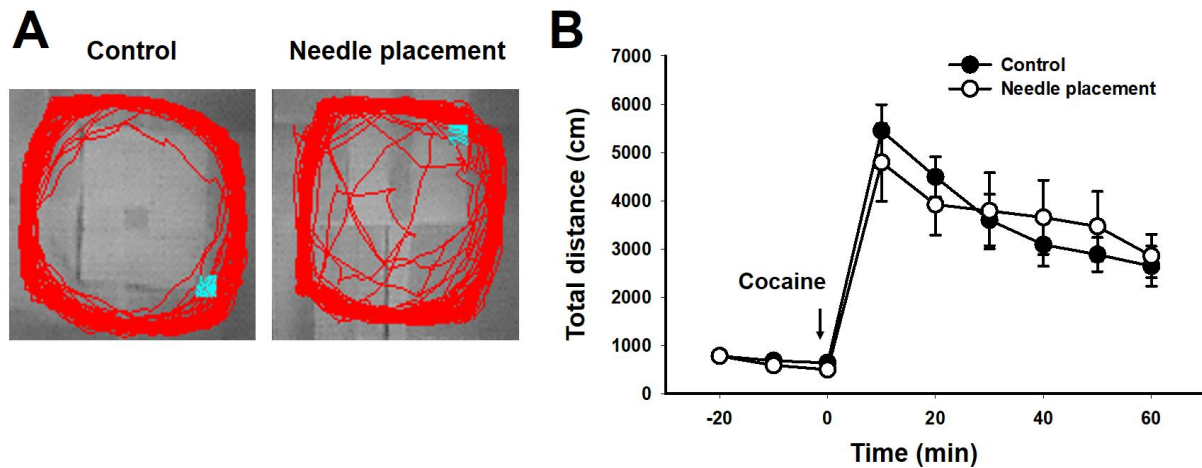

#### Supplementary Figure 1. Effect of needle placement on cocaine-enhanced locomotor activity.

**A.** Representative locomotor activity traces following cocaine injection in control and needle placement groups. **B.** The rats given needle insertion into HT7 without needle twisting (Needle placement;  $n=5$ ) did not show any inhibitory effects on cocaine-induced locomotor activity, compared to control ( $n=5$ , cocaine only)
